# Supplementary material for: Modulating p56Lck in T-Cells by a Chimeric Peptide Comprising Two Functionally Different Motifs of Tip fromHerpesvirus saimiri
Source: Hindawi journal article supplement (doi:10.1155/2015/395371), 2015-01-01

Supplementary Figure 2

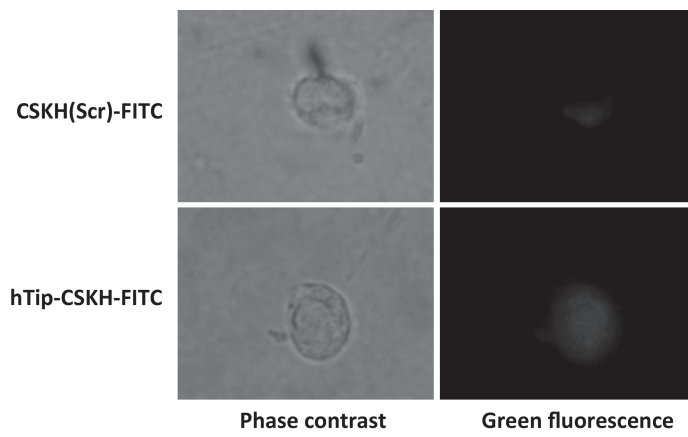

### Supplementary Figure 3

A

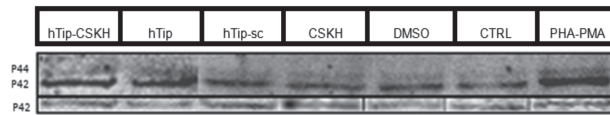

B

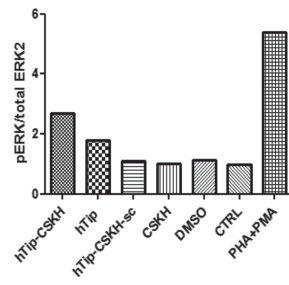

Supplementary Figure 4

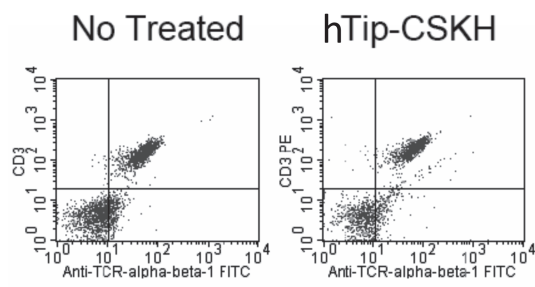

Supplement: f1 [file 395371.f1.pdf]
